# Supplementary material
Source: publisher figshare collection journal article supplement (https://diabetesjournals.figshare.com/ndownloader/files/33995207)
Supplement: Supplementary file 1 [file 33995207]

**Supplementary file 1. Search strategy:**

#### MEDLINE (Ovid)

(exp Diabetes Mellitus or Diabet*.mp or (diabetes adj2 mellitus).mp or exp glycated hemoglobin A) AND (exp Kidney Neoplasms or (kidney adj2 cancer).mp or (kidney adj2 neoplasm*).mp or (kidney adj2 carcinoma*).mp or (kidney adj2 tumour*).mp or (kidney adj2 tumor*).mp or (renal adj2 cancer).mp or (renal adj2 carcinoma*).mp or (renal adj2 neoplasm*).mp or (renal adj2 tumour*).mp or (renal adj2 tumor*).mp) AND (exp cohort study or (cohort adj2 stud*).mp or exp Case-Control study/ or (case*control adj2 stud*).mp

#### LILACS

Diabetes Mellitus (Decs) or Diabetes (Tw) or Diabetes Mellitus Tipo 2 (Tw) or Hemoglobina A Glicada (Decs) or Hemoglobina Glicosilada (Tw) AND Neoplasias Renales (Decs) or Cancer Renal (Tw) or Cancer de Riñon (Tw) or Carcinoma Renal (Tw) AND Estudio Observacional (Decs) or Estudios Observacionales como Asunto (Decs) or Cohorte (Tw) or Estudios de Cohorte (Tw) or Estudios de Casos y Controles (Tw).

#### EMBASE (Scopus)

TITLE-ABS-KEY (“Diabetes Mellitus” or “Diabet*” or “glycated hemoglobin A”) AND TITLE-ABS-KEY (“Kidney Neoplasm*” or “kidney cancer” or “kidney carcinoma*” or “kidney tumour*” or “kidney tumor*” or “renal cancer” or “renal carcinoma*” or “renal neoplasm*” or “renal tumour*” or “renal tumor*”) AND TITLE-ABS-KEY (“cohort stud*” or “Case*Control stud*”).

- 1. **CENTRAL (Ovid)**

(exp Diabetes Mellitus or Diabet*.mp or (diabetes adj2 mellitus).mp or exp glycated hemoglobin A) AND (exp Kidney Neoplasms or (kidney adj2 cancer).mp or (kidney adj2 neoplasm*).mp or (kidney adj2 carcinoma*).mp or (kidney adj2 tumour*).mp or (kidney adj2 tumor*).mp or (renal adj2 cancer).mp or (renal adj2 carcinoma*).mp or (renal adj2 neoplasm*).mp or (renal adj2 tumour*).mp or (renal adj2 tumor*).mp) AND (exp cohort study or (cohort adj2 stud*).mp or exp Case-Control study/ or (case*control adj2 stud*).mp
